# Supplementary material
Source: MDPI journal article supplement (https://www.mdpi.com/2071-1050/8/11/1098)
Supplement: s1 [file s1]

# Supplementary Materials: Evaluating the Interests of Different Stakeholders in Beijing Wastewater Reuse Systems for Sustainable Urban Water Management

Xiao Liang and Meine Pieter van Dijk

**Table S1.** Summary of the parameter used for determination of cost and benefits.

| Parameter | Definition                                                                  |
|-----------|-----------------------------------------------------------------------------|
| $I_1$     | initial investment of centralized plant (CNY ¥)                             |
| $M_1$     | O&M cost of centralized plant (CNY ¥/year)                                  |
| $E_1$     | cost of Carbon dioxide emission of centralized plant (CNY ¥/year)           |
| $b$       | unit cost per carbon dioxide emission (CNY ¥/ton)                           |
| $g$       | energy consumption of centralized plant (kWh/year)                          |
| $z$       | carbon dioxide emission rate (g/kWh)                                        |
| $H_1$     | cost of health risks of centralized plant (CNY ¥/year)                      |
| $d$       | DALY cost rate (CNY ¥ per DALY per year)                                    |
| $q$       | DALY rate (DALYs/person)                                                    |
| $k$       | registered permanent population living in Beijing (person)                  |
| $p_1$     | DALY probability associated with centralized plant (%)                      |
| $V_1$     | cost of residential resettlement of centralized plants (CNY ¥/year)         |
| $t$       | average increased public transport cost (CNY ¥ per person per day)          |
| $p$       | population density (person/m <sup>2</sup> )                                 |
| $l$       | length of pipe construction (m)                                             |
| $C_{G1}$  | total cost of centralized plant from perspective of MAC (CNY ¥)             |
| $r$       | discounting rate (%)                                                        |
| $n$       | estimation period (year)                                                    |
| $L_1$     | cost savings on fertilizers (CNY ¥/year)                                    |
| $u_f$     | unit cost of saving on fertilizers (CNY ¥/m <sup>3</sup> )                  |
| $f$       | amount of reused water for agricultural irrigation (m <sup>3</sup> )        |
| $O_1$     | benefit of increased water availability of centralized plants (CNY ¥/year)  |
| $u_e$     | monetary value of water (CNY ¥/m <sup>3</sup> )                             |
| $e_1$     | amount of total reused water of centralized plant (m <sup>3</sup> )         |
| $J_1$     | benefit of increase of jobs in centralized plant (CNY ¥/year)               |
| $\beta$   | ratio of employment growth to economic growth (%)                           |
| $w$       | number of increased jobs (person)                                           |
| $W$       | total employment amount of Beijing (person)                                 |
| $Y$       | gross domestic product of Beijing (CNY ¥)                                   |
| $B_{G1}$  | total benefits of centralized systems from perspective of MAC (CNY ¥)       |
| $I_2$     | initial investment of decentralized plant (CNY ¥)                           |
| $M_2$     | O&M cost of decentralized plant (CNY ¥/year)                                |
| $N_2$     | cost of noise pollution (CNY ¥/year)                                        |
| $C_u$     | unit noise pollution cost (CNY ¥ per person per year)                       |
| $u$       | number of affected people due to decentralized plant (person)               |
| $H_2$     | cost of health risks of decentralized plant (CNY ¥/year)                    |
| $p_2$     | DALY probability associated with decentralized plant (%)                    |
| $C_{G2}$  | total cost of the decentralized plant from perspective of MAC (CNY ¥)       |
| $X_2$     | cost savings on constructing pipes (CNY ¥)                                  |
| $C_L$     | unit construction costs (CNY ¥/m)                                           |
| $L$       | pipe length (m)                                                             |
| $O_2$     | benefit of increased water availability of decentralized plant (CNY ¥/year) |
| $e_2$     | reused water amount of decentralized plant (m <sup>3</sup> )                |
| $A_2$     | benefit of raising social awareness on water saving (CNY ¥/year)            |
| $a$       | average cost of public campaign in water sector (CNY ¥/year)                |
| $j$       | ratio of number of users to the total population of Beijing (%)             |

Table S1. Cont.

| Parameter | Definition                                                                                        |
|-----------|---------------------------------------------------------------------------------------------------|
| $B_{G2}$  | total benefit of decentralized plant from perspective of MAC (CNY ¥)                              |
| $C_{E1}$  | total cost of centralized plant from perspective of MEPB (CNY ¥)                                  |
| $C_{E2}$  | total cost of decentralized plant from perspective of MEPB (CNY ¥)                                |
| $B_{E1}$  | total benefit of centralized plant from perspective of MEPB (CNY ¥)                               |
| $B_{E2}$  | total benefit of decentralized plant from perspective of MEPB (CNY ¥)                             |
| $R_1$     | revenue of centralized plant (CNY ¥/year)                                                         |
| $R_2$     | revenue of decentralized plant (CNY ¥/year)                                                       |
| $S_1$     | subsidies of centralized plant (CNY ¥)                                                            |
| $S_2$     | subsidies of decentralized plant (CNY ¥)                                                          |
| $C_{P1}$  | total cost of centralized plant from perspective of plant manager (CNY ¥)                         |
| $C_{P2}$  | total cost of decentralized plant from perspective of plant manager (CNY ¥)                       |
| $B_{P1}$  | total benefit of centralized plant from perspective of plant manager (CNY ¥)                      |
| $B_{P2}$  | total benefit of decentralized plant from perspective of plant manager (CNY ¥)                    |
| $m_1$     | benefits of money saving of centralized plant (CNY ¥/m <sup>3</sup> )                             |
| $m_2$     | benefits of money saving of decentralized plant (CNY ¥/m <sup>3</sup> )                           |
| $C_{U1}$  | total cost of centralized plant from perspective of user (CNY ¥/m <sup>3</sup> )                  |
| $C_{U2}$  | total cost of decentralized plant from perspective of user (CNY ¥/m <sup>3</sup> )                |
| $Q_1$     | amount of reused water of centralized plants for domestic and landscape usage (m <sup>3</sup> )   |
| $Q_2$     | amount of reused water of decentralized plants for domestic and landscape usage (m <sup>3</sup> ) |
| $B_{U1}$  | total benefit of centralized plant from perspective of user (CNY ¥/m <sup>3</sup> )               |
| $B_{U2}$  | total benefit of decentralized plant from perspective of user (CNY ¥/m <sup>3</sup> )             |
